# Supplementary material for: Glucuronidation Pathways of 5- and 7-Hydroxypropranolol: Determination of Glucuronide Structures and Enzyme Selectivity
Source: MDPI journal article supplement (doi:10.3390/molecules28237783), 2023-11-26
Supplement: s1 [file s1]

## Glucuronidation Pathways of 5- and 7-Hydroxypropranolol: Determination of Glucuronide Structures and Enzyme Selectivity

Fan Yang<sup>1</sup>, Maxi Wenzel<sup>1</sup>, Matthias Bureik<sup>2</sup>, Maria Kristina Parr<sup>1,\*</sup>

<sup>1</sup> Pharmaceutical and Medicinal Chemistry (Pharmaceutical Analyses), Institute of Pharmacy, Freie Universität Berlin, Germany

<sup>2</sup> School of Pharmaceutical Science and Technology, Tianjin University, China

\* Correspondence: maria.parr@fu-berlin.de (M.K.P)

### Supplementary Material

**Supplementary Figure S1.** Product ion spectra (LC-QTOF-MS/MS) of (R)-4-hydroxypropranolol glucuronide (**A**) and (R)-7-hydroxypropranolol glucuronide (**B**), obtained from HLM incubations. (R)-4-hydroxypropranolol glucuronide,  $C_{22}H_{29}NO_9$ ,  $[M+H]^+$  theor. = 452.1915,  $[M+H]^+$  exp. = 452.1895,  $\Delta m/z = -4.42$  ppm, collision energy 30 eV; (R)-7-hydroxypropranolol glucuronide,  $C_{22}H_{29}NO_9$ ,  $[M+H]^+$  theor. = 452.1915,  $[M+H]^+$  exp. = 452.1918,  $\Delta m/z = 0.66$  ppm, collision energy 30 eV. The blue diamond indicates the precursor ion.

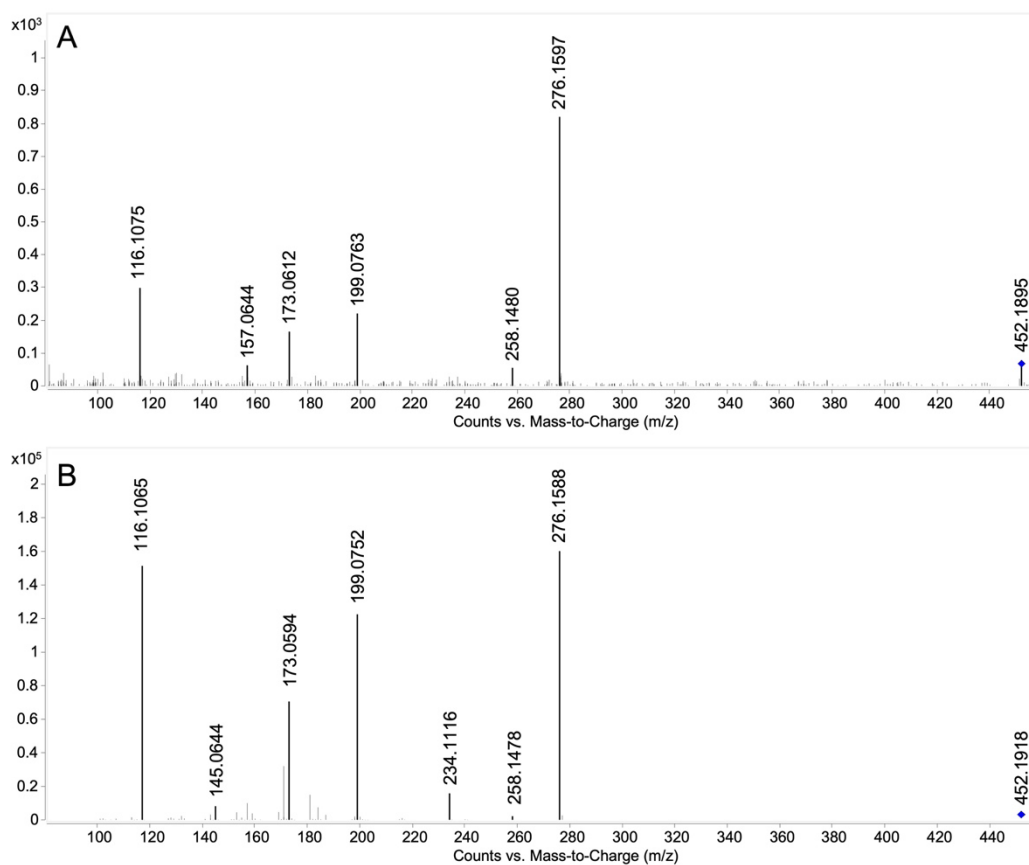

**Supplementary Figure S2.** Product ion spectra (LC-QTOF-MS/MS) of 4-methoxypropranolol glucuronide (**A**) and 7-methoxypropranolol glucuronide (**B**) obtained from UGT1A9 enzyme bag incubations. 4-Methoxypropranolol glucuronide,  $C_{23}H_{31}NO_9$ ,  $[M+H]^+$  theor. = 466.2072,  $[M+H]^+$  exp. = 466.2061,  $\Delta m/z = -2.36$  ppm, collision energy 30 eV; 7-methoxypropranolol glucuronide,  $C_{23}H_{31}NO_9$ ,  $[M+H]^+$  theor. = 466.2072,  $[M+H]^+$  exp. = 466.2058,  $\Delta m/z = -3.00$  ppm, collision energy 30 eV. The blue diamond indicates the precursor ion.

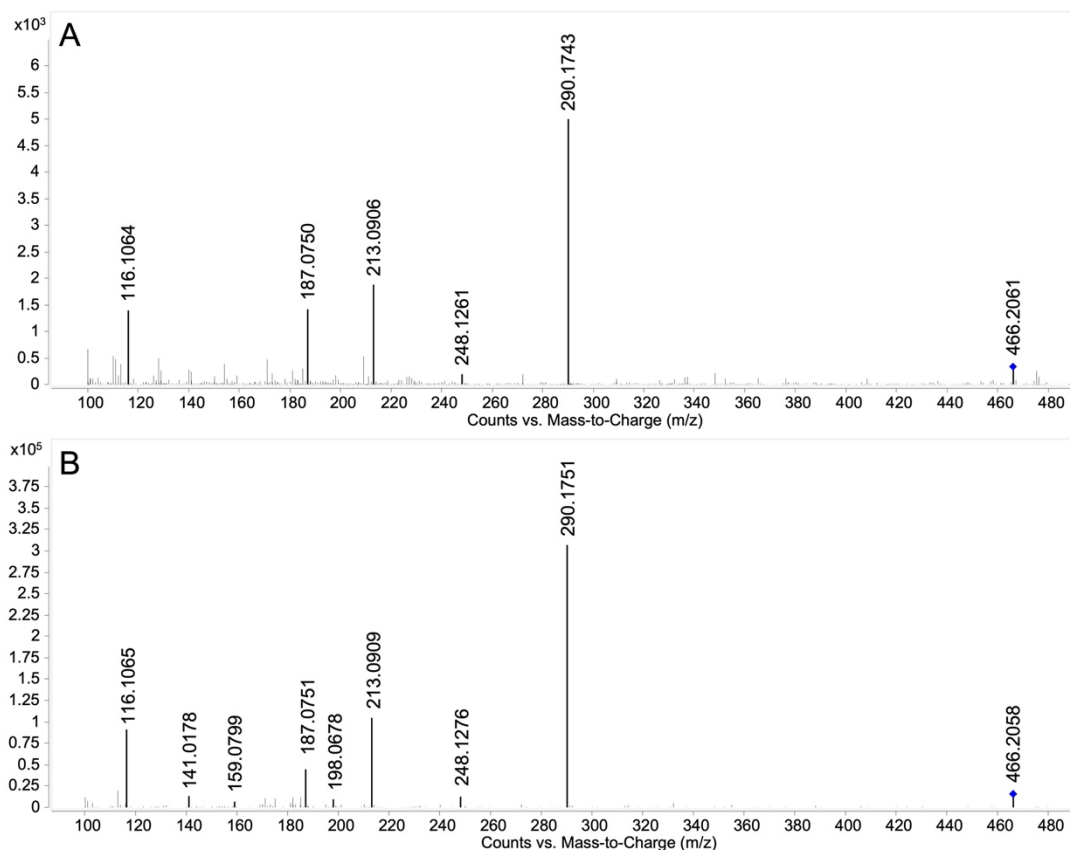

**Supplementary Figure S3.** Extracted ion chromatograms obtained from MS full-scan analysis (LC-QTOF-MS) of DMIS derivatives of 4-hydroxypropranolol. (**A**) 4-OHP-DMIS, mono-DMIS derivative of 4-hydroxypropranolol,  $[M+H]^+$  m/z 434; (**B**) 4-OHP-2DMIS, bis-DMIS derivative of 4-hydroxypropranolol,  $[M+H]^+$  m/z 592.

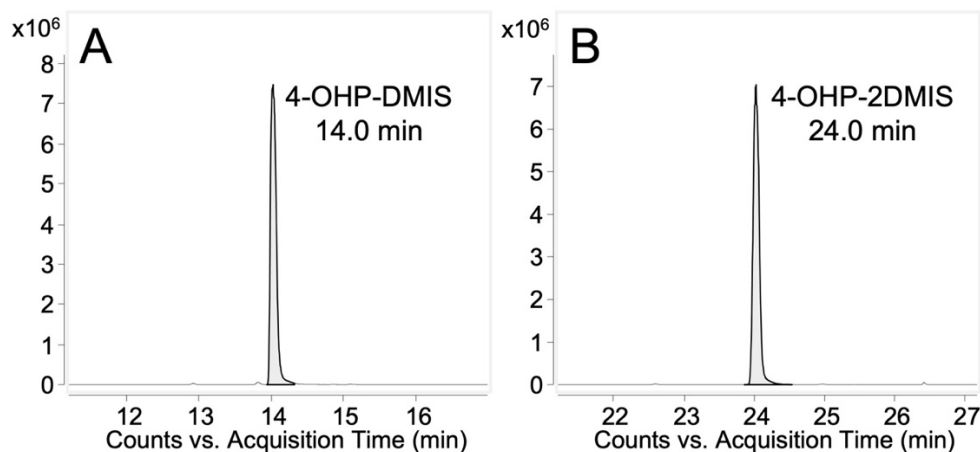

**Supplementary Figure S4.** Product ion spectra (LC-QTOF-MS/MS) of 4-hydroxypropanolol DMIS derivatives. **(A)** 4-Hydroxypropanolol-DMIS,  $C_{21}H_{27}N_3O_5S$ , corresponding to the peak in Supplementary Figure S3A,  $[M+H]^+$  theor. = 434.1744,  $[M+H]^+$  exp. = 434.1750,  $\Delta m/z = 1.38$  ppm, collision energy 30 eV; **(B)** 4-hydroxypropanolol-2DMIS,  $C_{26}H_{33}N_5O_7S_2$ , corresponding to the peak in Supplementary Figure S3B,  $[M+H]^+$  theor. = 592.1894,  $[M+H]^+$  exp. = 592.1889,  $\Delta m/z = -0.84$  ppm, collision energy 30 eV. DMIS, dimethylimidazole-4-sulfonyl. The blue diamond indicates the precursor ion.

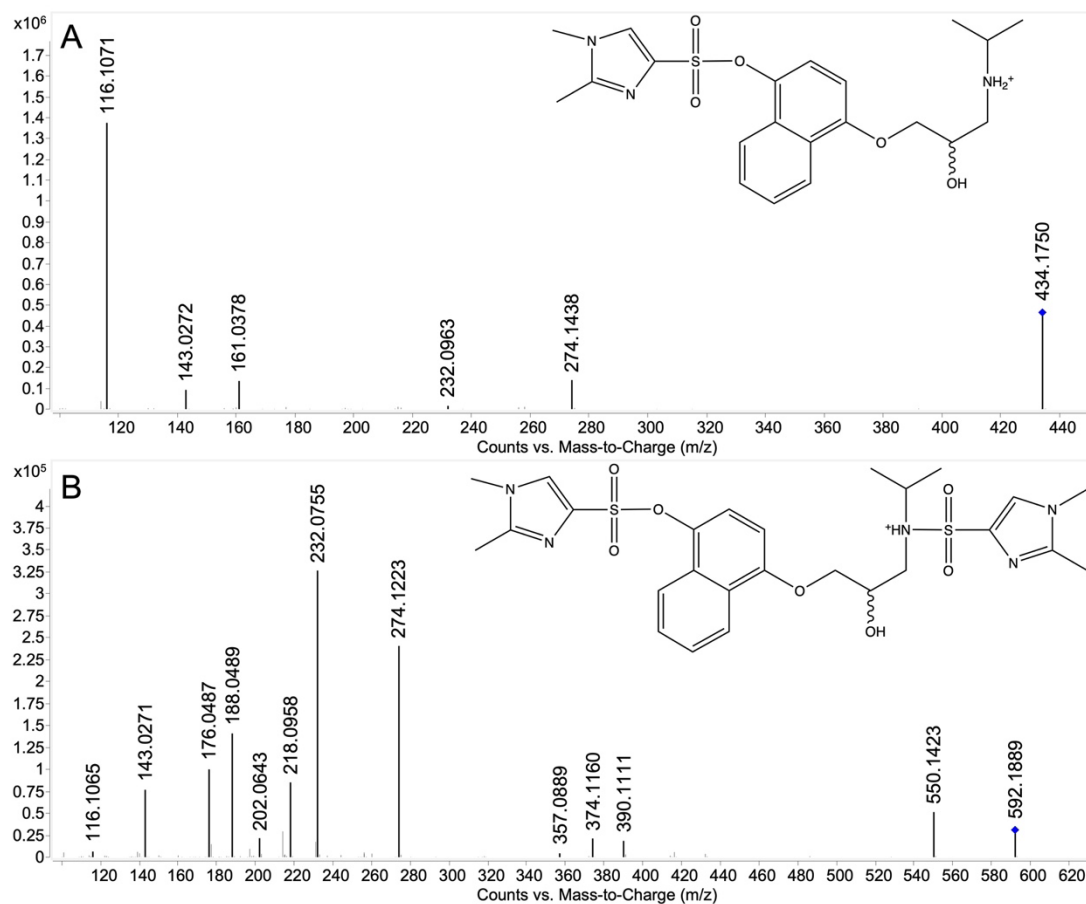

**Supplementary Figure S5.** Extracted ion chromatograms obtained from MS full-scan analysis (LC-QTOF-MS) of DMIS derivatives of 7-hydroxypropranolol. **(A)** 7-OHP-DMIS, mono-DMIS derivative of 7-hydroxypropranolol,  $[M+H]^+$   $m/z$  434; **(B)** 7-OHP-2DMIS, bis-DMIS derivative of 7-hydroxypropranolol,  $[M+H]^+$   $m/z$  592.

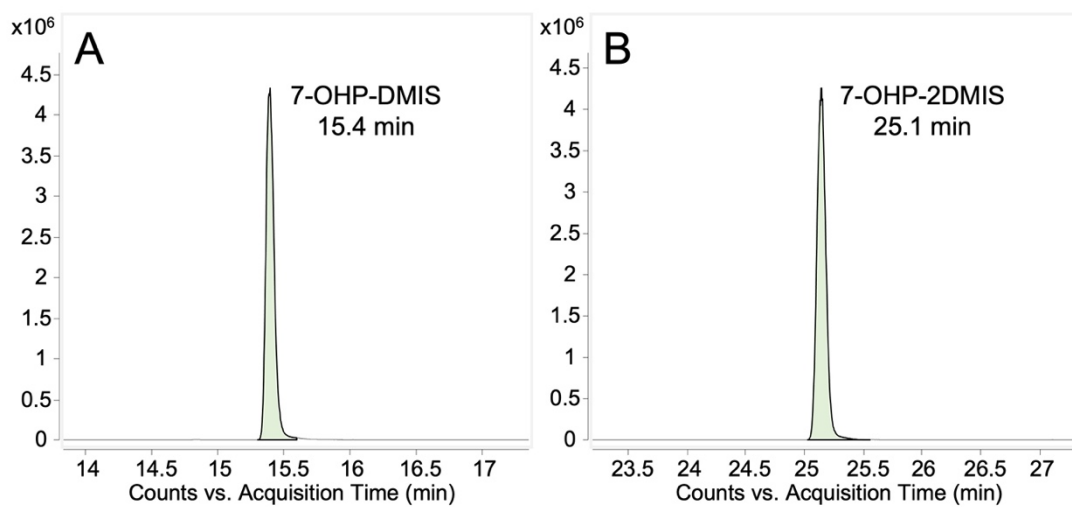

**Supplementary Figure S6.** Product ion spectra (LC-QTOF-MS/MS) of 7-hydroxypropanolol DMIS derivatives. **(A)** 7-Hydroxypropanolol-DMIS,  $C_{21}H_{27}N_3O_5S$ , corresponding to the peak in Supplementary Figure S5A,  $[M+H]^+$  theor. = 434.1744,  $[M+H]^+$  exp. = 434.1750,  $\Delta m/z$  = 1.38 ppm, collision energy 20 eV; **(B)** 7-hydroxypropanolol-2DMIS,  $C_{26}H_{33}N_5O_7S_2$ , corresponding to the peak in Supplementary Figure S5B,  $[M+H]^+$  theor. = 592.1894,  $[M+H]^+$  exp. = 592.1898,  $\Delta m/z$  = 0.68 ppm, collision energy 30 eV. DMIS, dimethylimidazole-4-sulfonyl. The blue diamond indicates the precursor ion.

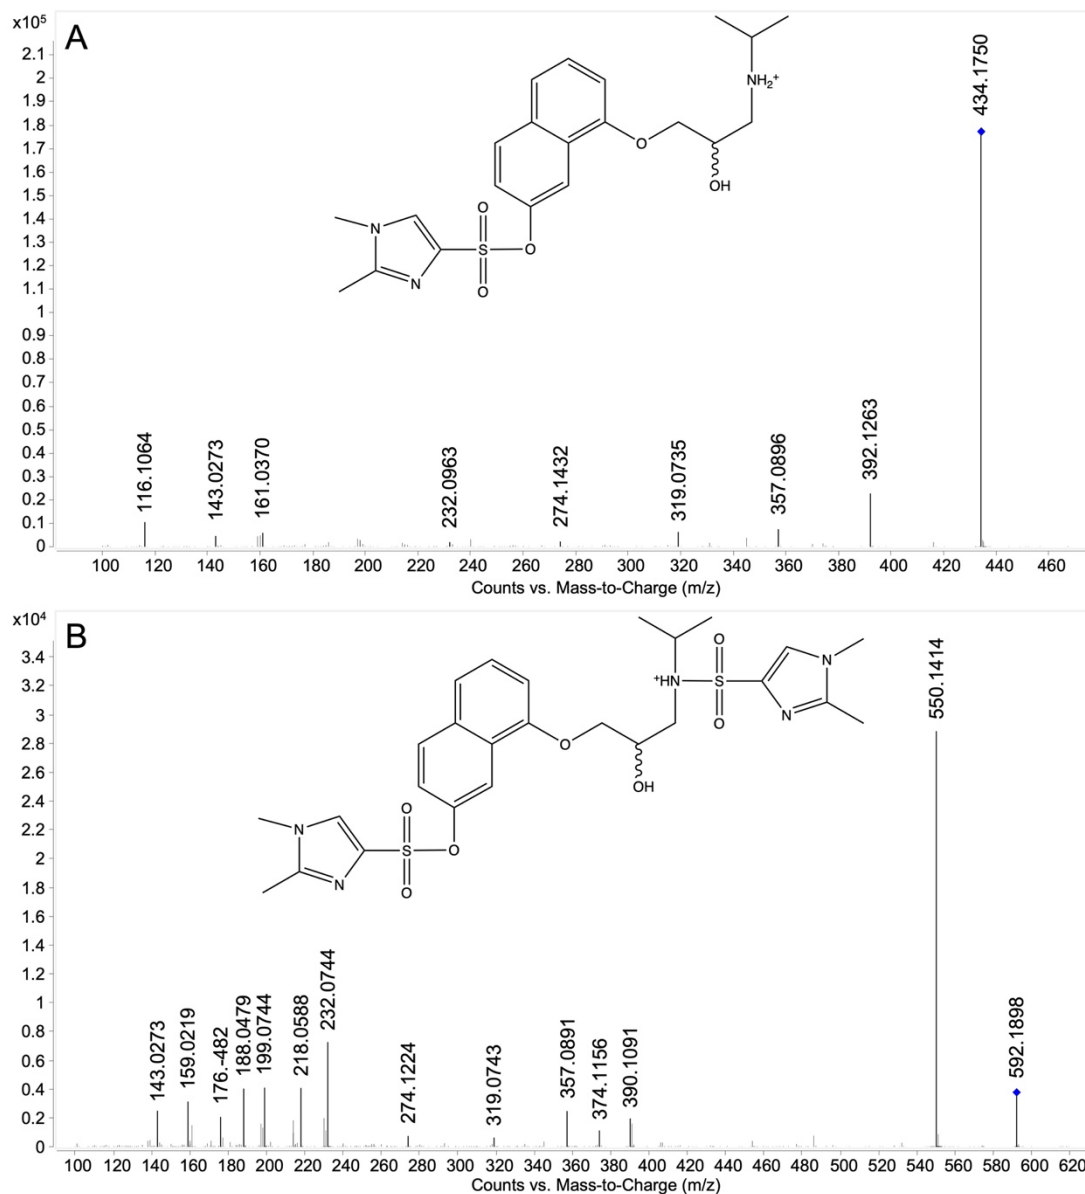

**Supplementary Figure S7.** Postulated structures of the obtained fragments from LC-QTOF-MS/MS analysis of 5-hydroxypropranolol glucuronide-DMIS I, corresponding to Figure 7A in main text.

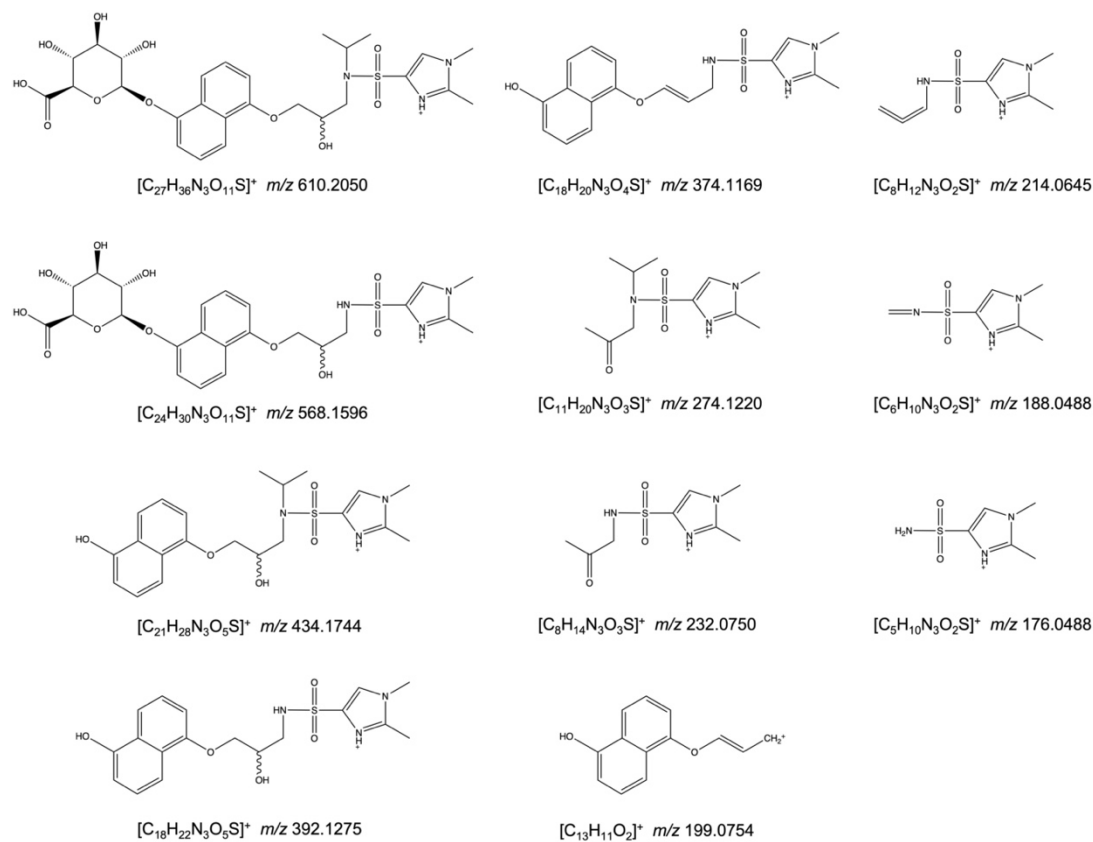

**Supplementary Figure S8.** Postulated structures of the obtained fragments from LC-QTOF-MS/MS analysis of 5-hydroxypropranolol glucuronide-DMIS III, corresponding to Figure 7B in main text.

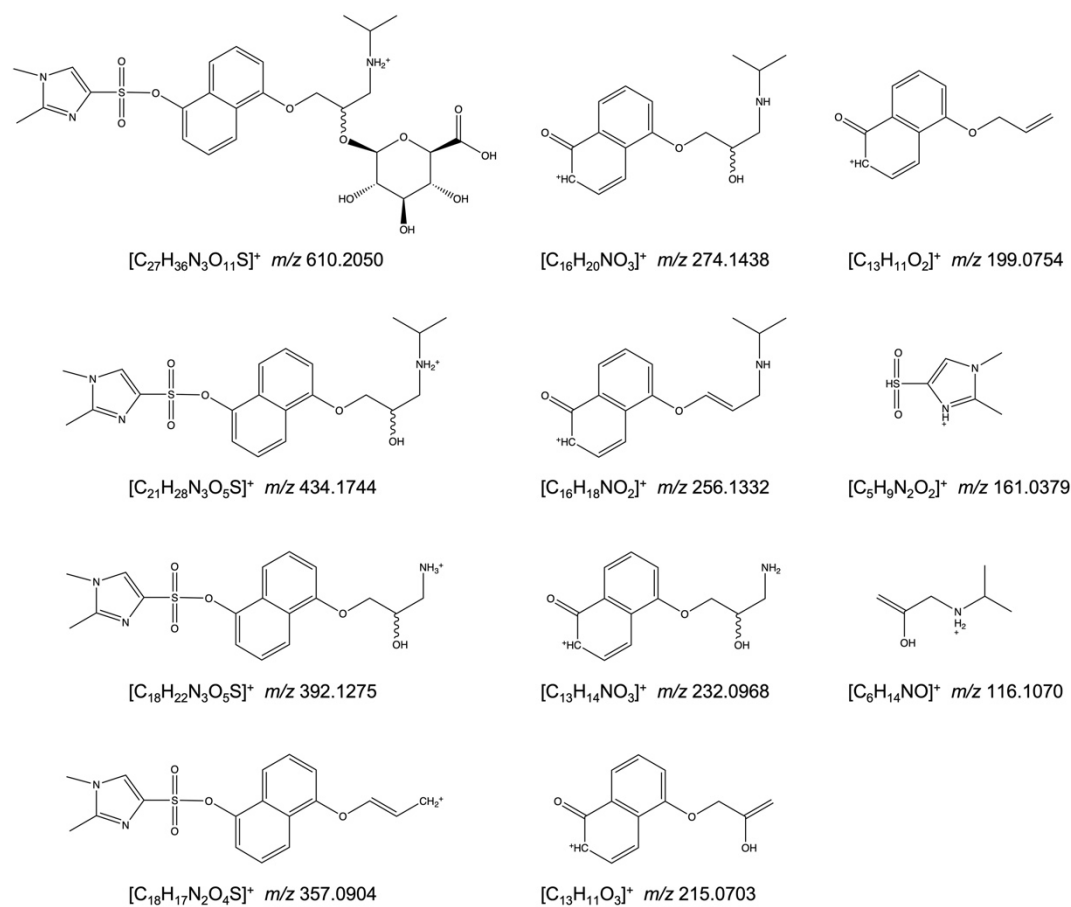





**Supplementary Figure S10.** Extracted ion chromatogram ( $[M+H]^+$   $m/z$  610) from MS full-scan (LC-QTOF-MS) of HLMs generated (S)-4-hydroxypropranolol glucuronides derivatized with DMISC. (S)-4OHPG DMIS I and II, DMIS derivative of (S)-4-hydroxypropranolol glucuronide.

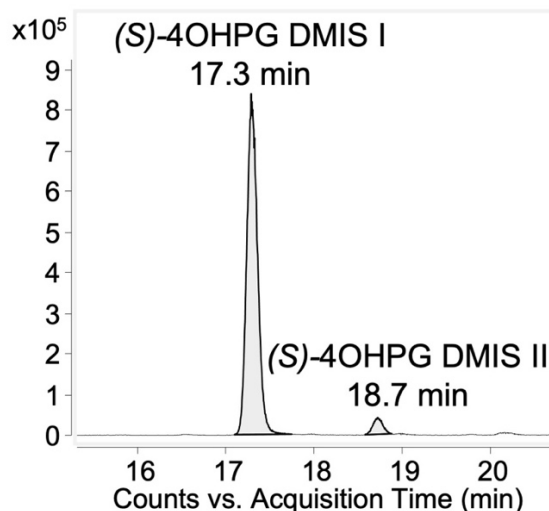

**Supplementary Figure S11.** Product ion spectra (LC-QTOF-MS/MS) of DMIS derivatives of (S)-4-hydroxypropranolol glucuronides derived from HLM incubations. (A) corresponding to (S)-4OHPG DMIS I in Supplementary Figure S10,  $C_{27}H_{35}N_3O_{11}S$ ,  $[M+H]^+$  theor. = 610.2075,  $[M+H]^+$  exp. = 610.2051,  $\Delta m/z$  = -3.93 ppm, collision energy 30 eV; (B) corresponding to (S)-4OHPG DMIS II in Supplementary Figure S10,  $C_{27}H_{35}N_3O_{11}S$ ,  $[M+H]^+$  theor. = 610.2075,  $[M+H]^+$  exp. = 610.2062,  $\Delta m/z$  = -2.13 ppm, collision energy 30 eV. The blue diamond indicates the precursor ion.

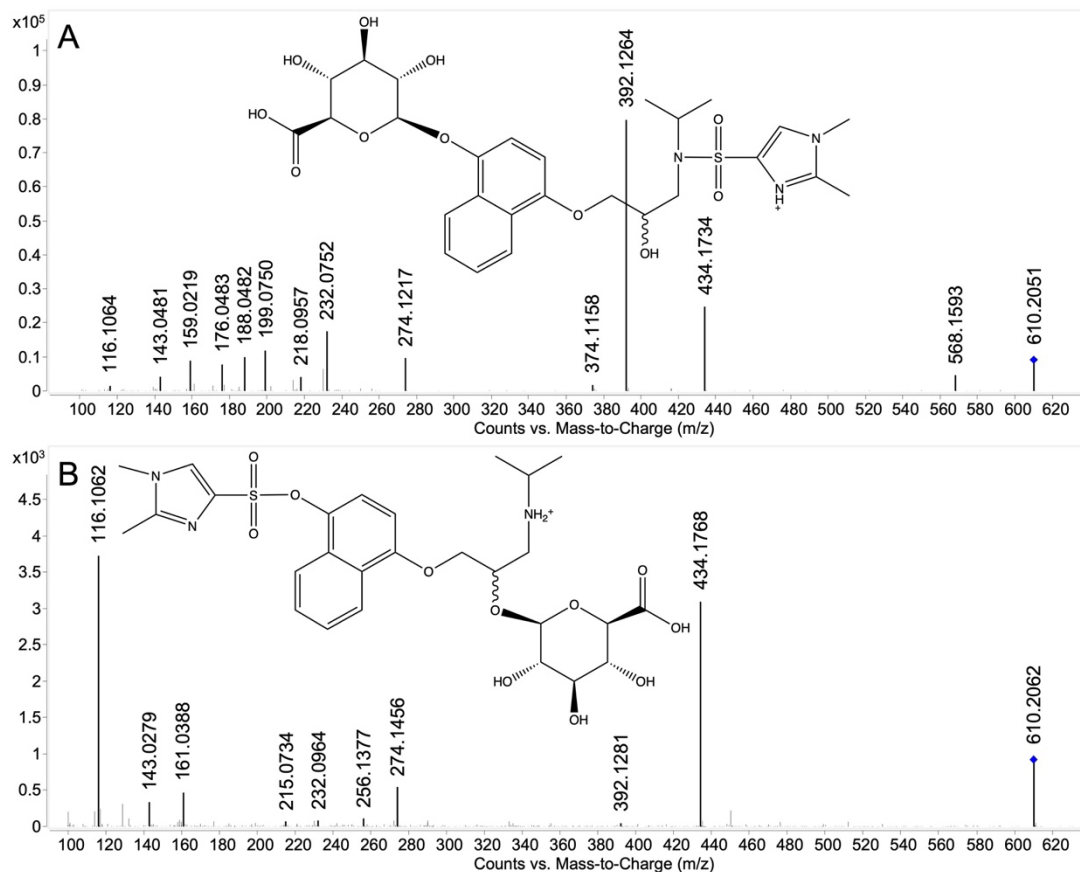

**Supplementary Figure S12.** Extracted ion chromatogram ( $[M+H]^+$   $m/z$  594) from MS full-scan (LC-QTOF-MS) of HLMs generated propranolol glucuronides derivatized with DMISC. (S)-PG-DMIS and (R)-PG-DMIS, DMIS derivatives of (S)-propranolol glucuronide and (R)-propranolol glucuronide. (A) incubation of racemic propranolol; (B) incubation of (R)-propranolol.

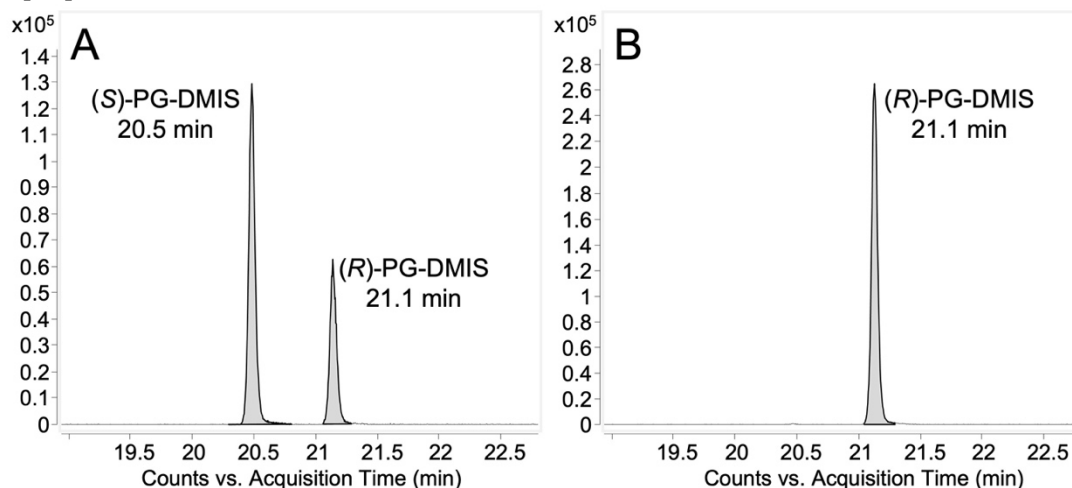

**Supplementary Figure S13.** Product ion spectra (LC-QTOF-MS/MS) of DMIS derivatives of propranolol glucuronides, corresponding to (R)-PG-DMIS in Supplementary Figure S12B. Propranolol glucuronide-DMIS,  $C_{27}H_{35}N_3O_{10}S$ ,  $[M+H]^+$  theor. = 594.2116,  $[M+H]^+$  exp. = 594.2120,  $\Delta m/z = 0.67$  ppm, collision energy 30 eV. The blue diamond indicates the precursor ion.

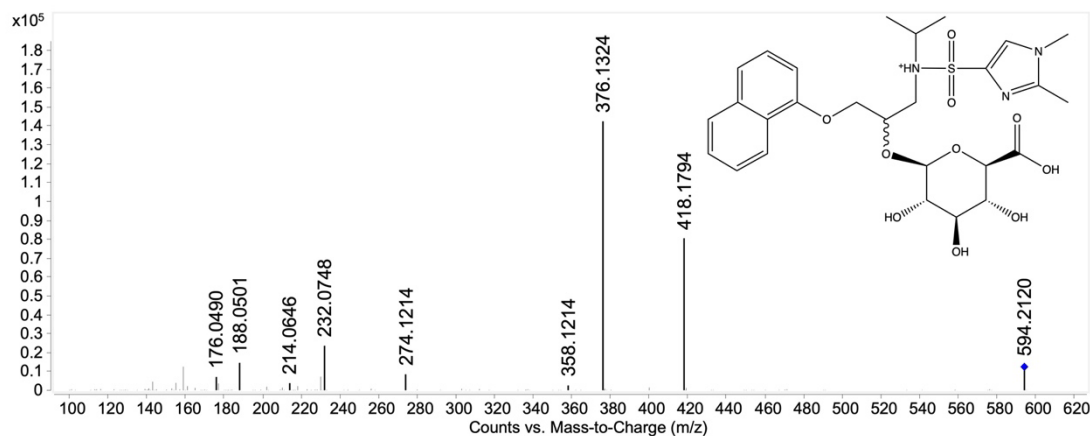

**Supplementary Figure S14.** Postulated structures of the obtained fragments from LC-QTOF-MS/MS analysis of propranolol glucuronide-DMIS, corresponding to Supplementary Figure S13.

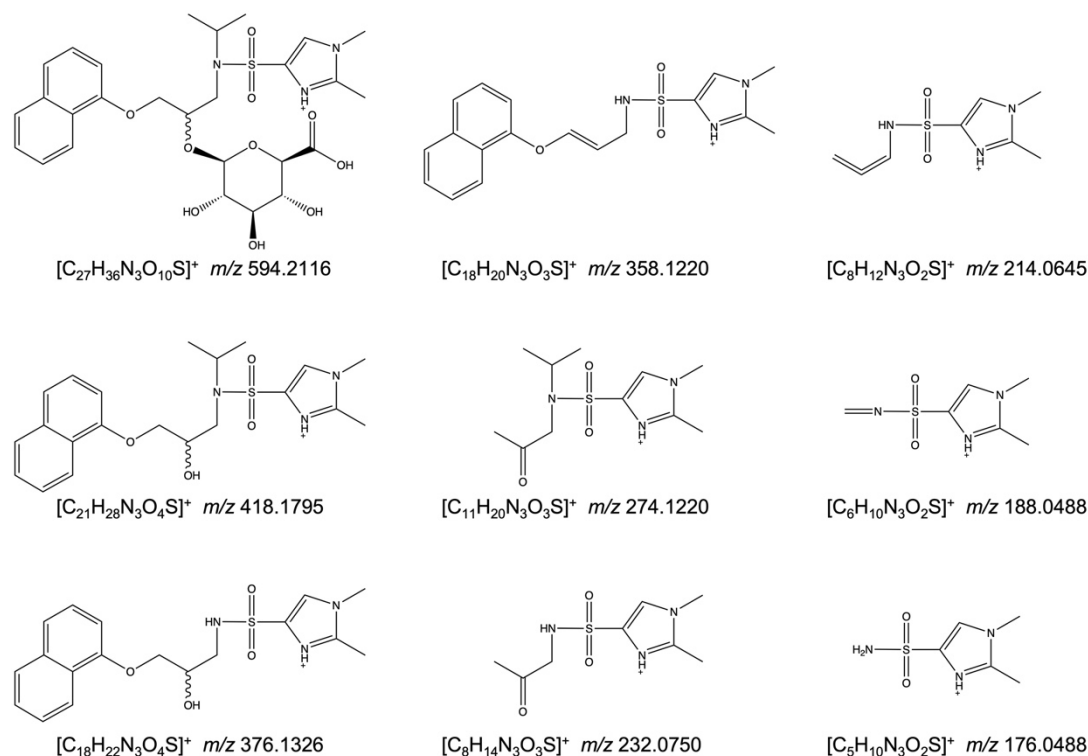

**Supplementary Figure S15.** Product ion spectra (LC-QTOF-MS/MS) of the peak at 16.9 min obtained from urine sample.  $C_{22}H_{29}NO_9$ ,  $[M+H]^+$  theor. = 452.1915,  $[M+H]^+$  exp. = 452.1950,  $\Delta m/z$  = 7.74 ppm, collision energy 30 eV. The blue diamond indicates the precursor ion.

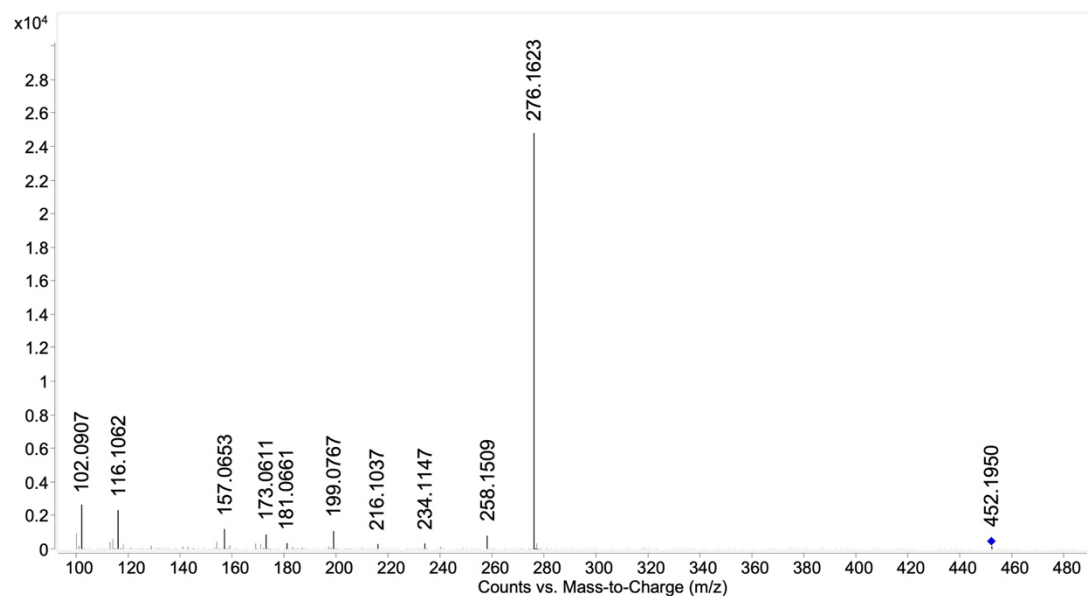

**Supplementary Figure S16.** Chromatogram (LC-QQQ-MS/MS) of additional 5-hydroxypropranolol glucuronides in 24-hours HLM incubations using 5-OHP as substrate. The displayed ion transition is  $m/z$  452 $\rightarrow$ 72.

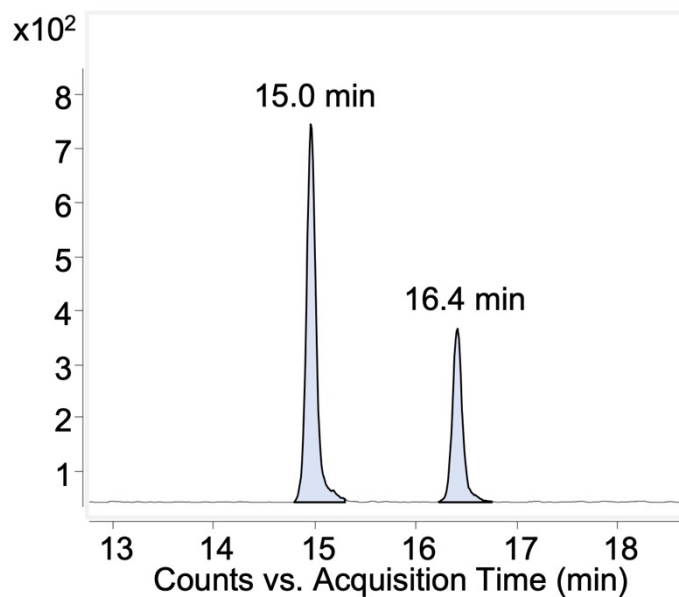

**Supplementary Figure S17.** Product ion spectra (LC-QTOF-MS/MS) of the additional 5-hydroxypropranolol glucuronides in 24-hours HLM incubations.  $C_{22}H_{29}NO_9$ ,  $[M+H]^+$  theor. = 452.1915,  $[M+H]^+$  exp. = 452.1947,  $\Delta m/z$  = 7.08 ppm, collision energy 40 eV. The blue diamond indicates the precursor ion.

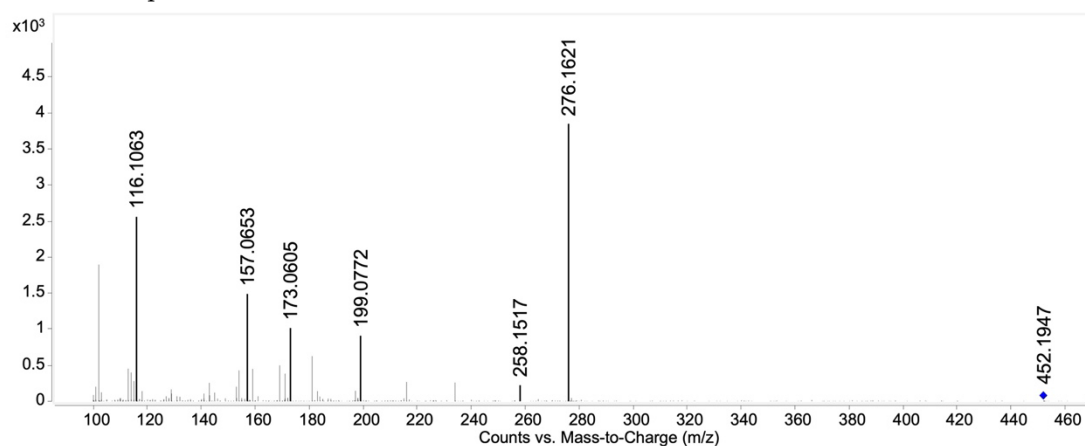

**Supplementary Table S1.** Abundance of 4-,5- and 7-hydroxypropranolol glucuronides observed in urine samples. The presented peak areas were provided by transitions of the highest intensity as indicated in Figure 1.

| Collected post administration (h) | (S)-4-OHPG | (R)-4-OHPG | (S)-5-OHPG | (R)-5-OHPG | (S)-7-OHPG | (R)-7-OHPG |
|-----------------------------------|------------|------------|------------|------------|------------|------------|
| 0.7                               | -          | -          | -          | -          | -          | -          |
| 2.4                               | ++++       | ++         | -          | +          | ++         | ++         |
| 5.1                               | ++++       | ++         | -          | +          | ++         | ++         |
| 7.3                               | ++++       | ++         | -          | +          | ++         | +++        |
| 8.2                               | ++++       | ++         | -          | +          | ++         | +++        |
| 9.5                               | ++++       | ++         | -          | +          | ++         | +++        |
| 13.3                              | +++++      | +++        | -          | ++         | ++         | +++        |
| 17.6                              | +++++      | +++        | -          | ++         | ++         | ++++       |
| 20.6                              | ++++       | +++        | -          | +          | +          | ++         |
| 23.0                              | ++++       | ++         | -          | +          | +          | ++         |
| 38.8                              | ++         | +          | -          | -          | -          | ++         |
| 61.6                              | +          | +          | -          | -          | -          | ++         |
| 87.5                              | +          | +          | -          | -          | -          | ++         |
| 98.3                              | -          | -          | -          | -          | -          | +          |
| 167.9                             | -          | -          | -          | -          | -          | +          |

"+" for peak area < 1,000; "++" for peak area 1,000 – 10,000; "+++" for peak area 10,000 – 25,000; "++++" for peak area 25,000 – 40,000; "+++++" for peak area > 40,000, "-" not detected. (S)- or (R)-4-/5-/7-OHPG, (S)- or (R)-4-/5-/7-hydroxypropranolol glucuronide.

**Supplementary Text S1: Yeast culture**

Initially, fission yeast strains were incubated at a temperature of 30 °C on Edinburgh Minimal Medium (EMM) solid medium supplemented with leucine for a duration of three days. Following this, the cells were transferred to 10 mL of EMM liquid medium containing leucine and agitated at 230 rpm at the same temperature for a period of 24 hours. After the initial incubation, 10 mL of the pre-culture were transferred into 100 mL of EMM liquid medium supplemented with leucine in a 200 mL flask. The flask was then placed in an incubator at 30 °C with continuous agitation at 230 rpm for a duration of 48 hours. The yeast cell density was determined using a microscope, and aliquots of  $5 \times 10^7$  yeast cells were prepared for the subsequent single enzyme bags reaction.
